# Supplementary material
Source: HighWire-hosted journal article supplement (http://www.cmajopen.ca/highwire/filestream/90670/field_highwire_adjunct_files/4/open-2022-0210-5-at.pdf)
Supplement: open-2022-0210-5-at.pdf [file open-2022-0210-5-at.pdf]

**Appendix Table 5: Modified Poisson regression models of likelihood to be unvaccinated (i.e., partial and no vaccination) against SARS-CoV-2 amongst persons with select mental health conditions**

|                                        | Age and sex adjusted<br>PR (95%LCL, 95%UCL) | Age, sex, rurality and SES adjusted<br>PR (95%LCL, 95%UCL) | Fully adjusted<br>PR (95%LCL, 95%UCL) |
|----------------------------------------|---------------------------------------------|------------------------------------------------------------|---------------------------------------|
| Schizophrenia-Schizoaffective disorder | 1.44 (1.43, 1.46)                           | 1.21 (1.20, 1.23)                                          | 1.32 (1.31, 1.34)                     |
|                                        | PR (95%LCL, 95%UCL)                         | PR (95%LCL, 95%UCL)                                        | PR (95%LCL, 95%UCL)                   |
| Alcohol                                | 1.43 (1.42, 1.44)                           | 1.27 (1.26, 1.28)                                          | 1.44 (1.43, 1.45)                     |
| Adjustment for:                        | Age, Sex                                    | Age, Sex, Income, Homelessness                             | Age, Sex, Income, Homelessness, cADGs |

Legend: PR = prevalence ratio, LCL = Lower Confidence Limit; UCL = Upper Confidence Limit; cADG = collapsed Aggregated Diagnosis Group
